# Supplementary material
Source: PubMed Central journal article supplement (PMC1283448)
Supplement: pnas_0507802102_1.pdf [file pnas_0507802102_1.pdf]

## Fitted parameters for the four-state models for kinesin yielding the velocity and randomness plots shown in Fig. 7

The parameters are as follows: First, requiring that the biochemical states (1), (2) and (3) be colocalized and fixing the substep distance at  $d_0 = 0.15$  nm (equal to that for  $N=2$ ) yields satisfactory fits to both  $V(F_x, [\text{ATP}])$  and  $r(F_x, [\text{ATP}])$  (see the solid curves in Fig. 7) when the zero-load rate constants are given by

$$\begin{aligned} k_0^0 &= 1.45 \mu\text{M}^{-1} \cdot \text{s}^{-1}, & w_1^0 &= 80 \text{ s}^{-1}, & u_1^0 &= 520 \text{ s}^{-1}, \\ w_2^0 &= 20 \text{ s}^{-1}, & u_2^0 &= 250 \text{ s}^{-1}, & w_3^0 &= 20 \text{ s}^{-1}, \\ u_3^0 &= 250 \text{ s}^{-1}, & k'_0 &= 0.03 \mu\text{M}^{-1} \cdot \text{s}^{-1}, & c_0 &= 0.5 \mu\text{M}, \end{aligned} \quad [11]$$

while the load distribution vectors, apart from  $\theta_1^+ = \theta_2^\pm = \theta_3^- = 0$ , are (with the factor  $c_{\parallel} = 1.45$  incorporated in the  $z$  components)

$$\begin{aligned} \theta_0^+ d &= (1.15, 0, -0.35) \text{ nm}, & \theta_1^- d &= (-1.00, 0, -0.10) \text{ nm}, \\ \theta_3^+ d &= (0.42, 0, -0.35) \text{ nm}, & \theta_0^- d &= (7.63, 0, 0.80) \text{ nm}. \end{aligned} \quad [12]$$

The forward rates in **11** are similar to those found previously (see ref. 1 Eq. **14**); but the balance of the reverse rates is rather different as, of course, are the load distribution factors.

Next, imposing  $\theta_1^+ = \theta_2^- = \theta_3^+ = \theta_0^- = 0$ , which implies that states (1), (2) and (3), (4) are colocalized, and fixing  $d_0 = 0.6$  nm yields the fit

$$\begin{aligned} k_0^0 &= 1.3 \mu\text{M}^{-1} \cdot \text{s}^{-1}, & w_1^0 &= 20 \text{ s}^{-1}, & u_1^0 &= 290 \text{ s}^{-1}, \\ w_2^0 &= 40 \text{ s}^{-1}, & u_2^0 &= 290 \text{ s}^{-1}, & w_3^0 &= 0.9 \text{ s}^{-1}, \\ u_3^0 &= 780 \text{ s}^{-1}, & k'_0 &= 7 \mu\text{M}^{-1} \cdot \text{s}^{-1}, & c_0 &= 70 \mu\text{M}, \end{aligned} \quad [13]$$

with the load distribution vectors (including the factor  $c_{\parallel}$ )

$$\begin{aligned} \theta_0^+ d &= (0.90, 0, -0.25) \text{ nm}, & \theta_1^- d &= (-0.29, 0, -0.57) \text{ nm}, \\ \theta_2^+ d &= (0.29, 0, -0.32) \text{ nm}, & \theta_3^- d &= (7.30, 0, 1.14) \text{ nm}. \end{aligned} \quad [14]$$

See the dashed curves in Fig. 7.

Finally, when we impose the colocalization of states (2), (3) and (4), by setting  $\theta_2^+ = \theta_3^\pm = \theta_0^- = 0$ , and again take  $d_0 = 0.6$  nm, the data are best fitted (see the dotted curves in Fig. 7) with the parameters

$$\begin{aligned} k_0^0 &= 1.65 \mu\text{M}^{-1} \cdot \text{s}^{-1}, & w_1^0 &= 4.0 \text{ s}^{-1}, & u_1^0 &= 290 \text{ s}^{-1}, \\ w_2^0 &= 5 \text{ s}^{-1}, & u_2^0 &= 1800 \text{ s}^{-1}, & w_3^0 &= 20 \text{ s}^{-1}, \\ u_3^0 &= 300 \text{ s}^{-1}, & k'_0 &= 55 \mu\text{M}^{-1} \cdot \text{s}^{-1}, & c_0 &= 1.0 \mu\text{M}, \end{aligned} \quad [15]$$

and the load distribution vectors

$$\begin{aligned} \theta_0^+ d &= (0.94, 0, -0.37) \text{ nm}, & \theta_1^- d &= (-0.33, 0, -0.54) \text{ nm}, \\ \theta_2^+ d &= (-0.16, 0, -0.14) \text{ nm}, & \theta_2^- d &= (7.75, 0, 1.05) \text{ nm}. \end{aligned} \quad [16]$$

This fit is considerably improved if one allows  $d_0 = 1.1$  nm; but, as explained, such a relatively large value is excluded by the single-step observations (2,3).

### References:

1. Fisher, M. E. & Kolomeisky, A. B. (2001) *Proc. Natl. Acad. Sci. USA* **98**, 7748-7753.
2. Carter, N. J. & Cross, R. A. (2005) *Nature* **435**, 308-312.
3. Nishiyama, M., Muto, E., Inoue, Y., Yanagida, T. & Higuchi, H. (2001) *Nature Cell Biol.* **3**, 425-428.
